# Supplementary material
Source: publisher figshare collection journal article supplement (https://frontiersin.figshare.com/ndownloader/files/17496386)
Supplement: Supplementary file 1 [file 17496386]

## Appendix A: Appendix: Stream function

A general relation between the velocity field and the stream function  $\psi$  can be expressed by

$$\mathbf{v} = -\nabla \times (\psi \nabla \phi), \quad (\text{A1})$$

which implies  $\nabla \cdot \mathbf{v} = 0$ . As mentioned earlier, in the case of translational motion and spherical coordinates only the radial component and the polar component of the velocity field are relevant  $\mathbf{v} = \{v_r, v_\theta, 0\}$ . The velocity field in spherical coordinates is expressed in terms of the stream function  $\psi(r, \theta)$  as

$$v_r = \frac{-1}{r^2 \sin \theta} \frac{\partial \psi(r, \theta)}{\partial \theta}, \quad v_\theta = \frac{1}{r \sin \theta} \frac{\partial \psi(r, \theta)}{\partial r}. \quad (\text{A2})$$

The stream function satisfies [39]

$$-\nabla \times \nabla \times \nabla \times \mathbf{v} = \frac{1}{r \sin \theta} E^4 \psi \mathbf{e}_\phi \quad (\text{A3})$$

where  $E^4$  is a fourth order partial differential operator

$$E^4 \equiv (E^2)^2, \quad E^2 = \left[ \frac{\partial^2}{\partial r^2} + \frac{\sin \theta}{r^2} \frac{\partial}{\partial \theta} \left( \frac{1}{\sin \theta} \frac{\partial}{\partial \theta} \right) \right]. \quad (\text{A4})$$

In order to account for small viscosity perturbations also the stream function is expressed as  $\psi = \psi_0 + \epsilon \psi_1 + \dots$ . We take the curl of Eqs. (6a) and (7b). Inserting the stream function leads to scalar equations for the leading and the first order momentum equations

$$O(\epsilon^0): \quad E^4 \psi_0 = 0 \quad (\text{A5})$$

$$O(\epsilon^1): \quad E^4 \psi_1 = h_1(r, \theta), \quad (\text{A6})$$

where  $h_1(r, \theta) = -r \sin \theta (\nabla \eta_1 \times \nabla p_0 + \nabla \times (\nabla \eta_1 \cdot [\nabla \mathbf{v}_0 + (\nabla \mathbf{v}_0)^T]))_{\mathbf{e}_\phi}$  depends on the leading order solution.

## Appendix B: Appendix: First order solution for the velocity

First, we express the boundary conditions ((7c) and (7d)) in terms of the stream function  $\psi_1$ . The no-slip boundary conditions require that the first order velocity has to vanish at the surface of a sphere:

$$v_{r1} = \frac{-1}{r^2 \sin \theta} \frac{\partial \psi_1}{\partial \theta} = 0 \quad \text{at} \quad |\mathbf{r}| = 1 \quad (\text{B1a})$$

$$v_{\theta 1} = \frac{1}{r \sin \theta} \frac{\partial \psi_1}{\partial r} = 0 \quad \text{at} \quad |\mathbf{r}| = 1. \quad (\text{B1b})$$

The quiescent fluid in the far-field requires:

$$\frac{\partial_\theta \psi_1}{r^2} \rightarrow 0, \text{ and } \frac{\partial_r \psi_1}{r} \rightarrow 0 \text{ for } |\mathbf{r}| \rightarrow \infty. \quad (\text{B1c})$$

We look for a solution in terms of the Gegenbauer functions  $\{\mathcal{J}_n\}_n$  (see C), which are eigenfunctions of the angular part of the  $E^2$  operator, and hence also of the  $E^4$  operator, with the eigenvalues  $\{-n(n-1)\}_n$  and provide a complete orthogonal system. Assuming separation of variables we make the ansatz

$$\psi_1(r, \theta) = \sum_{n \geq 2}^{\infty} f_n(r) \mathcal{J}_n(\zeta), \quad \zeta = \cos \theta. \quad (\text{B2})$$

The corresponding first order velocity field is then obtained from Eq. (A2) and is expressed in terms of Legendre's polynomials  $P_n$  and Gegenbauer functions  $\mathcal{J}_n$

$$v_{r1} = \frac{1}{r^2} \sum_{n \geq 2} f_n(r) P_n(\zeta) \quad (\text{B3a})$$

$$v_{\theta 1} = \frac{1}{r} \sum_{n \geq 2} f'_n(r) \frac{\mathcal{J}_n(\zeta)}{\sin \theta}. \quad (\text{B3b})$$

The restriction  $n \geq 2$  refers to the fact that the velocity field has singularities for the modes  $n \in \{0, 1\}$  at  $\theta \in [0, \pi]$  which lead to infinite tangential velocities. Further, we expand the inhomogeneity  $h_1(r, \theta)$  in Eq. (A6) in Gegenbauer functions (see Eq. (C5))

$$h_1(r, \theta) = \sum_{n \geq 2} R_n(r) \mathcal{J}_n(\zeta). \quad (\text{B4})$$

The coefficients are calculated using Eq. (C7), from which it follows that the first two modes  $R_0(r), R_1(r) = 0$  always vanish. Inserting the ansatz (B3) and the expansion (B4) into Eq. (A6) we obtain

$$\sum_{n \geq 2} \mathcal{J}_n(\zeta) E_n^4(r) f_n(r) = \sum_{l \geq 2} R_l(r) \mathcal{J}_l(\zeta),$$

where the differential operator  $E_n^4(r)$  is given by

$$E_n^4(r) \equiv \frac{\partial^4}{\partial r^4} - \left( \frac{2}{r^2} \frac{\partial^2}{\partial r^2} - \frac{4}{r^3} \frac{\partial}{\partial r} + \frac{6}{r^4} - \frac{n(n-1)}{r^4} \right) n(n-1). \quad (\text{B5})$$

In order to decouple Gegenbauer modes we apply the orthogonality of the Gegenbauer functions under the scalar product given by Eq. (C2) to obtain

$$\forall_{n \geq 2}: \quad E_n^4(r) f_n(r) = R_n(r). \quad (\text{B6})$$

For given functions  $R_n(r)$ , which depend on the viscosity variation  $\eta_1$ , each coefficient  $f_n(r)$  of the ansatz (B2) can be determined by an ODE with the differential operator  $E_n^4(r)$ . A solution for an arbitrary inhomogeneity  $h_1(r, \theta)$  can be provided by the Green function integration. This requires the knowledge of the Green function for each differential operator  $E_n^4(r)$ .

### Appendix C: Appendix: Gegenbauer functions

The Gegenbauer functions of degree  $-1/2$  can be represented by Legendre Polynomials  $P_n$

$$\mathcal{J}_n(\zeta) = \frac{P_{n-2}(\zeta) - P_n(\zeta)}{2n-1} . \quad (\text{C1})$$

They are defined on the interval  $\zeta \in [-1, 1]$  and for our pupose we choose  $\zeta = \cos \theta$  with  $\theta \in [0, \pi]$ . The Gegenbauer functions are a complete orthogonal system with the relation

$$\begin{aligned} \langle \mathcal{J}_m(\zeta) | \mathcal{J}_n(\zeta) \rangle_\zeta &= \int_{-1}^1 \frac{\mathcal{J}_n(\zeta) \mathcal{J}_m(\zeta)}{1-\zeta^2} d\zeta \\ &= \begin{cases} 0 , & m \neq n \\ \frac{2}{n(n-1)(2n-1)} , & m = n \end{cases} , \quad n \geq 2 \end{aligned} \quad (\text{C2})$$

which is not valid for  $n \in \{0, 1\}$ . Further they satisfy the relation

$$\int_{-1}^1 \mathcal{J}_n(\zeta) d\zeta = \begin{cases} 2 , & n = 0 \\ \frac{2}{3} , & n = 2 \\ 0 , & n \neq \{0, 2\} \end{cases} \quad (\text{C3})$$

The first derivative of Gegenbauer functions is

$$\frac{d\mathcal{J}_n(\zeta)}{d\zeta} = -P_{n-1}(\zeta) \quad (\text{C4})$$

An axisymmetric function  $f(\theta)$  which first through  $n^{th}$  derivatives are continuous  $f \in C^n([0, \pi])$  can be expressed in terms of Gegenbauer functions and also its  $1 - n^{th}$  derivatives

$$f(\theta) = \sum_{l=0}^{\infty} \beta_l \mathcal{J}_l(\zeta) \quad (\text{C5})$$

$$\partial_\theta^k f(\theta) = \sum_{l=0}^{\infty} \beta_l^k \mathcal{J}_l(\zeta) , \quad 1 \leq k \leq n . \quad (\text{C6})$$

The coefficients  $\beta_l$  are defined as

$$\begin{aligned} \beta_l &= \frac{1}{2} l(l-1)(2l-1) \langle f(\zeta) | \mathcal{J}_l(\zeta) \rangle_\zeta \\ &= \frac{1}{2} l(l-1)(2l-1) \int_{-1}^1 f(\zeta) \frac{\mathcal{J}_l(\zeta)}{1-\zeta^2} d\zeta . \end{aligned} \quad (\text{C7})$$

The coefficients  $\beta_0, \beta_1 = 0$  are zero by definition.
